# Supplementary material for: Translational insights from EAE models : decoding MOGAD pathogenesis and therapeutic innovation
Source: Frontiers journal article supplement (doi:10.3389/fimmu.2025.1530977), 2025-05-20
Supplement: Data_Sheet_4.pdf [file Data_Sheet_4.pdf]

**Table 4** Current Clinical Trials in MOGAD and Related Neuroimmunological Disorders

| NCT Number  | Study Title                                                                                                                                                                       | Acronym   | Study Status       | Conditions                                               | Interventions                                                       | Primary Outcome Measures                                                                      | Enrollment | Phases        |
|-------------|-----------------------------------------------------------------------------------------------------------------------------------------------------------------------------------|-----------|--------------------|----------------------------------------------------------|---------------------------------------------------------------------|-----------------------------------------------------------------------------------------------|------------|---------------|
| NCT06452537 | Safety and Efficacy of Tocilizumab in Patients With MOGAD                                                                                                                         | TOMATO    | Recruiting         | MOGAD                                                    | DRUG: Tocilizumab<br>DRUG: Prednisone                               | Time from randomization to the first MOGAD relapse as determined by an adjudication committee | 102        | PHASE2/3      |
| NCT06474520 | Efficacy and Safety of Calculus Bovis Sativus (CBS) for Idiopathic Inflammatory Demyelinating Disease                                                                             | CBSinIIDD | Not Yet Recruiting | Idiopathic Inflammatory Demyelinating Disease, MS, NMOSD | DRUG: Calculus bovis sativus (CBS)                                  | Modified Rankin Scale (mRS) within 12 weeks after treatment initiation                        | 250        | NA            |
| NCT06541626 | Sun Yat-Sen Cohort of CNS Idiopathic Inflammatory Demyelinating Diseases                                                                                                          |           | Not Yet Recruiting | MS, NMOSD,MOGAD                                          |                                                                     | Relapse, Long-term neurological function assessed using the EDSS                              | 450        | OBSERVATIONAL |
| NCT05271409 | A Study to Evaluate the Efficacy, Safety, Pharmacokinetics, and Pharmacodynamics of Satralizumab in Patients With Myelin Oligodendrocyte Glycoprotein Antibody-Associated Disease | Meteoroid | Not Yet Recruiting | MOGAD                                                    | DRUG: Satralizumab,<br>OTHER: Placebo                               | Time from randomization to the first occurrence of a MOGAD relapse in the DB treatment period | 152        | PHASE3        |
| NCT05204459 | MS-ResearchBiomarkerS                                                                                                                                                             | MS-ReBS   | Recruiting         | MS, NADs, Healthy Aging                                  |                                                                     | Identifying risk factors for disability progression                                           | 1000       |               |
| NCT05063162 | A Study to Evaluate the Efficacy and Safety of Rozanolixizumab in Adult Participants With MOGAD                                                                                   | cosMOG    | Recruiting         | MOGAD                                                    | DRUG: Rozanolixizumab,<br>OTHER: Placebo                            | Time from randomization to first independently centrally adjudicated relapse                  | 104        | PHASE3        |
| NCT04561557 | Safety and Efficacy of CT103A Cells for Relapsed/Refractory Antibody-associated Inflammatory Diseases of the Nervous System                                                       | CARTinNS  | Recruiting         | Autoimmune Diseases of the Nervous System                | BIOLOGICAL: CT103A cells,<br>DRUG: Cyclophosphamide and fludarabine | Types and incidence of dose-limiting toxicity (DLT)                                           | 36         | EARLY PHASE1  |

|             |                                                                               |         |                    |                              |                                           |                         |      |           |
|-------------|-------------------------------------------------------------------------------|---------|--------------------|------------------------------|-------------------------------------------|-------------------------|------|-----------|
| NCT06443333 | National, Multicentric Registry Study on Neuroimmunological Diseases in China | NIDBase | Recruiting         | MS, NMO, Myasthenia Gravis   | Data collection and follow-up observation | Annual recurrence rate  | 7000 | N/A       |
| NCT06280755 | Clinical Impact Through AI-assisted MS Care                                   | RECLAIM | Not Yet Recruiting | MS, NMO                      | N/A                                       | Data contribution       | 7000 | N/A       |
| NCT05605951 | Acute Optic Neuritis Network                                                  | ACON    | Recruiting         | MS,NMO                       | Non-interventional study                  | Visual outcomes         | 200  | N/A       |
| NCT05545384 | Immediate vs Delayed Treatment in Anti-MOG Syndromes                          | IDAR    | Not Yet Recruiting | Acute Demyelinating Syndrome | Azathioprine, Rituximab                   | Annualized relapse rate | 86   | Phase 2/3 |
| NCT05349006 | Azathioprine in MOGAD                                                         | MOGwAI  | Not Yet Recruiting | MOGAD                        | Azathioprine, Placebo                     | Time to first relapse   | 126  | Phase 3   |

This table summarizes ongoing and planned clinical trials pertinent to Myelin Oligodendrocyte Glycoprotein Antibody-associated Disease (MOGAD) and related neuroimmunological disorders. It encompasses 12 trials, including interventional studies evaluating novel therapeutics such as tocilizumab, satralizumab, and rozanolixizumab, as well as observational studies and registries. The trials span various phases, from early Phase 1 to Phase 3, and include both adult and pediatric populations. Key information provided includes NCT numbers, study titles, acronyms, enrollment targets, and primary outcome measures. This comprehensive overview offers insights into the current landscape of MOGAD research, highlighting emerging treatment strategies and efforts to enhance understanding of disease progression and management.
